# Supplementary material for: Anthocyanin Composition in Cabernet Sauvignon Grape Skins: Effect of Regulated Deficit Irrigation in a Warm Climate
Source: MDPI journal article supplement (doi:10.3390/horticulturae8090796), 2022-09-01
Supplement: s1 [file s1]

Archive with 4 entries (4 files):
- Figure S1 Temperatures Aris et al 2022.pdf
- Table S1 Aris et al 2022.jpg
- Table S2 Aris et al 2022.jpg
- Table S3 Aris et al 2022.jpg
