# Supplementary figures and images for: Anthocyanin Composition in Cabernet Sauvignon Grape Skins: Effect of Regulated Deficit Irrigation in a Warm Climate
Source: MDPI journal article supplement (doi:10.3390/horticulturae8090796), 2022-09-01

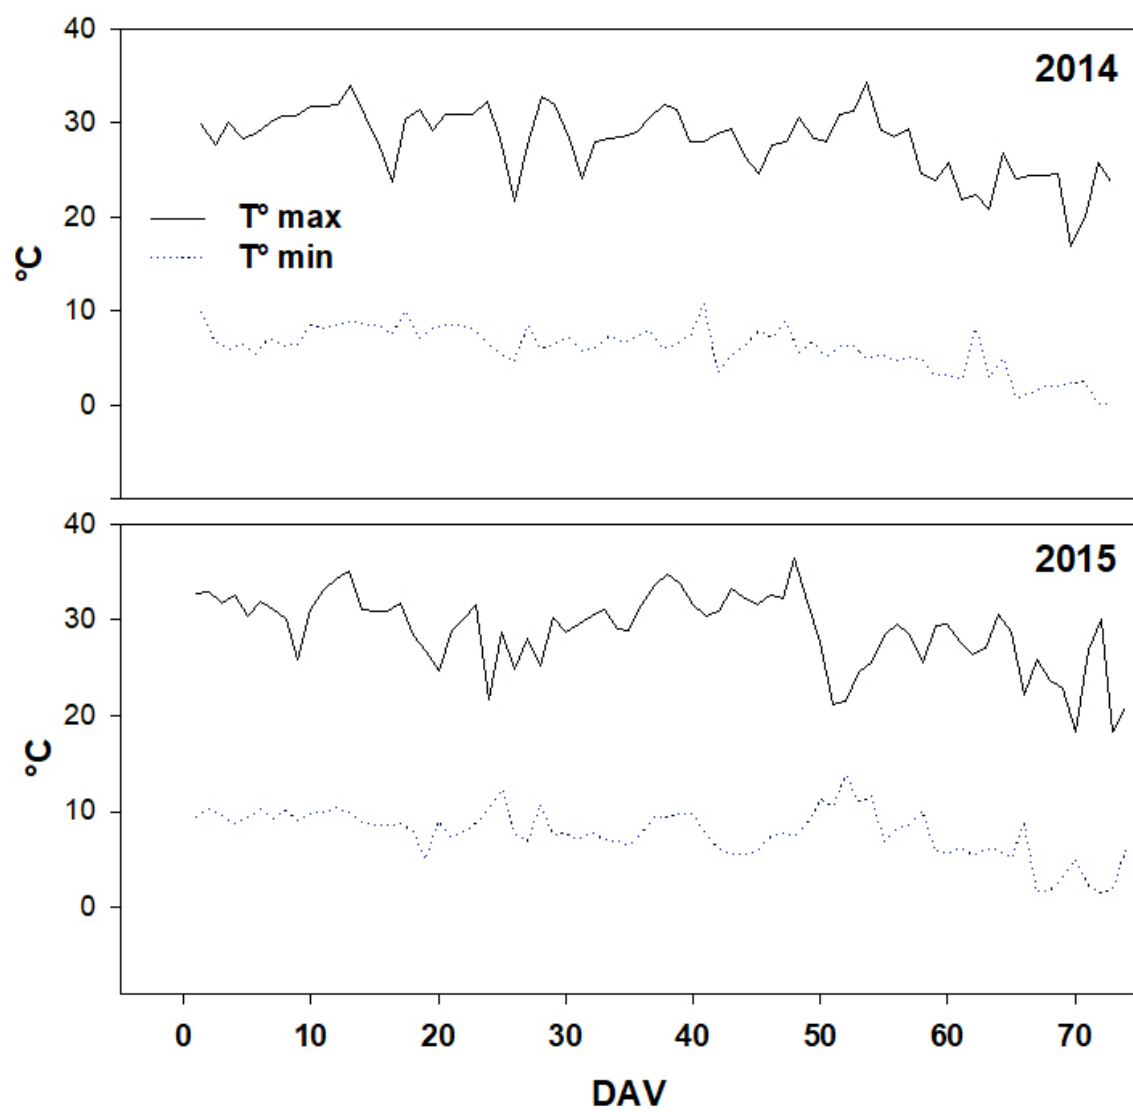

**Figure S1.** Maximum and minimum temperatures during trial assay (January to April)

Supplement: s1 [file s1]

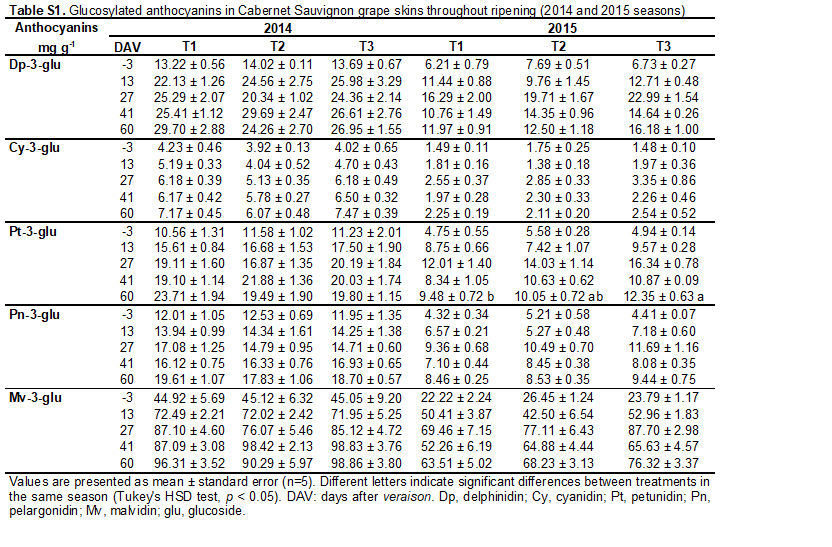

Supplement: s1 [file s1 › Table S1 Aris et al 2022.jpg]

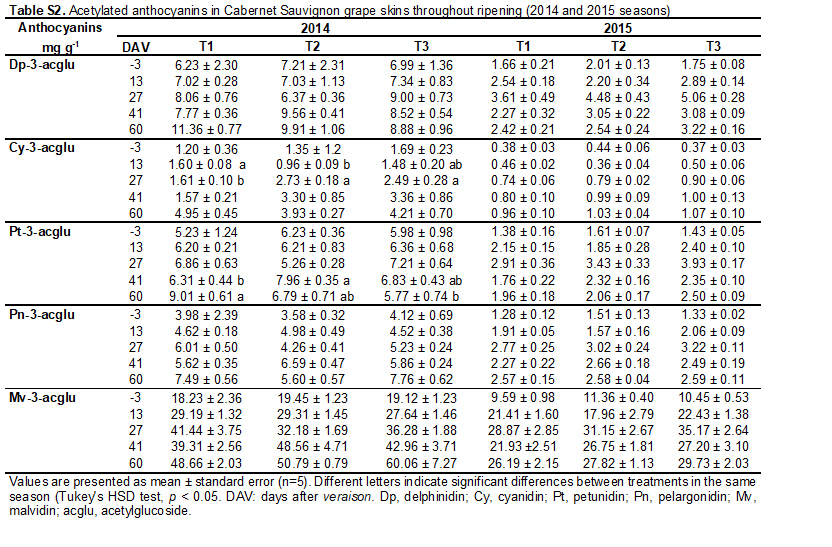

Supplement: s1 [file s1 › Table S2 Aris et al 2022.jpg]

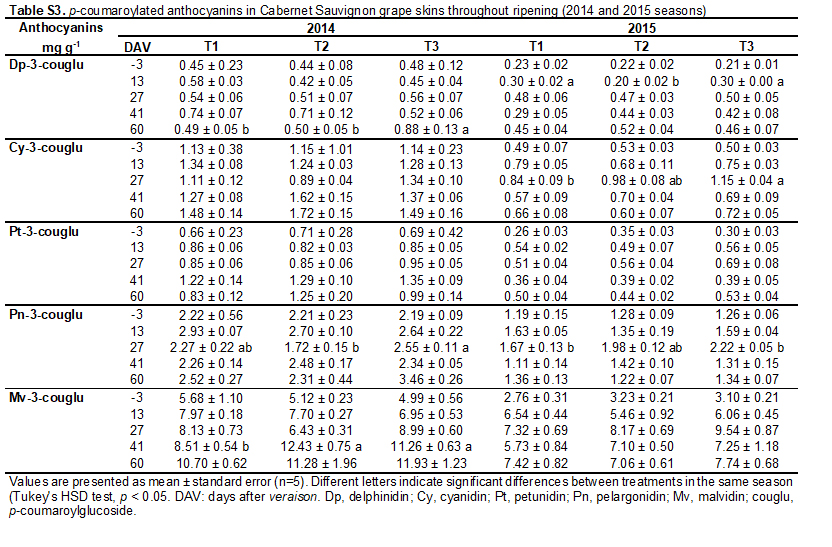

Supplement: s1 [file s1 › Table S3 Aris et al 2022.jpg]
